# Supplementary material for: The coexistence of longτQTMand highUeffas a concise criterion for a good single-molecule magnet: a theoretical case study of square antiprism dysprosium single-ion magnets
Source: Royal Society of Chemistry journal article supplement (doi:10.1039/d2cp00776b), 2022-01-01
Supplement: d2cp00776b1.pdf [file d2cp00776b1.pdf]

## The coexistence of long $\tau_{\text{QTM}}$ and high $U_{\text{eff}}$ as a concise criterion for good single-molecule magnet. A theoretical case study of square antiprism dysprosium single-ion magnets

Hong Liu,<sup>a</sup> Jin-Feng Li<sup>b</sup> and Bing Yin<sup>a\*</sup>

<sup>a</sup>Key Laboratory of Synthetic and Natural Functional Molecule of the Ministry of Education, Lab of Theoretical Molecular Magnetism, College of Chemistry and Materials Science, Northwest University, Xi'an, 710127 P. R. China

<sup>b</sup>College of Chemistry and Chemical Engineering, Shaanxi Key Laboratory of Chemical Reaction Engineering, Yan'an University, Yan'an, 716000, P. R. China

\* Corresponding author, E-mail: rayinyin@nwu.edu.cn

TABLE S1 *ab initio* calculated principal g values and energies of the lowest-lying KDs of WALQAE

| WALQAE                | KD0       | KD1       | KD2       | KD3       | KD4       | KD5       | KD6       | KD7       |
|-----------------------|-----------|-----------|-----------|-----------|-----------|-----------|-----------|-----------|
| $g_x$                 | 6.165E-05 | 2.821E-03 | 1.496E-01 | 3.570E+00 | 4.724E+00 | 4.884E-01 | 5.640E-01 | 1.867E-01 |
| $g_y$                 | 8.793E-05 | 3.066E-03 | 1.875E-01 | 5.816E+00 | 2.866E-01 | 3.021E+00 | 2.967E+00 | 5.994E-01 |
| $g_z$                 | 1.990E+01 | 1.707E+01 | 1.399E+01 | 9.321E+00 | 9.023E+00 | 1.035E+01 | 1.425E+01 | 1.938E+01 |
| E (cm <sup>-1</sup> ) | 0.000E+00 | 2.591E+02 | 4.784E+02 | 6.123E+02 | 6.661E+02 | 7.420E+02 | 7.602E+02 | 7.963E+02 |

TABLE S2 *ab initio* calculated principal g values and energies of the lowest-lying KDs of VORCUD

| VORCUD                | KD0       | KD1       | KD2       | KD3       | KD4       | KD5       | KD6       | KD7       |
|-----------------------|-----------|-----------|-----------|-----------|-----------|-----------|-----------|-----------|
| $g_x$                 | 1.002E-04 | 3.163E-02 | 5.033E-01 | 5.937E-01 | 1.490E+00 | 1.137E+00 | 1.705E+00 | 1.001E-01 |
| $g_y$                 | 1.798E-04 | 3.268E-02 | 9.897E-01 | 2.347E+00 | 3.682E+00 | 1.975E+00 | 2.910E+00 | 1.653E-01 |
| $g_z$                 | 1.994E+01 | 1.706E+01 | 1.341E+01 | 1.630E+01 | 1.136E+01 | 9.433E+00 | 1.467E+01 | 1.958E+01 |
| E (cm <sup>-1</sup> ) | 0.000E+00 | 2.887E+02 | 5.626E+02 | 6.529E+02 | 7.238E+02 | 7.564E+02 | 8.054E+02 | 9.666E+02 |

TABLE S3 *ab initio* calculated principal g values and energies of the lowest-lying KDs of WALPUX

| WALPUX                | KD0       | KD1       | KD2       | KD3       | KD4       | KD5       | KD6       | KD7       |
|-----------------------|-----------|-----------|-----------|-----------|-----------|-----------|-----------|-----------|
| $g_x$                 | 1.272E-03 | 8.366E-02 | 2.984E-01 | 1.572E+00 | 5.236E+00 | 2.992E+00 | 8.965E-01 | 9.615E-02 |
| $g_y$                 | 1.406E-03 | 8.691E-02 | 3.245E-01 | 2.296E+00 | 3.652E-01 | 5.217E+00 | 2.047E+00 | 2.034E-01 |
| $g_z$                 | 1.983E+01 | 1.673E+01 | 1.323E+01 | 1.022E+01 | 6.833E+00 | 1.019E+01 | 1.774E+01 | 1.959E+01 |
| E (cm <sup>-1</sup> ) | 0.000E+00 | 2.021E+02 | 3.470E+02 | 4.351E+02 | 4.911E+02 | 5.331E+02 | 5.657E+02 | 6.091E+02 |

TABLE S4 *ab initio* calculated principal g values and energies of the lowest-lying KDs of ISEBIS

| ISEBIS                | KD0       | KD1       | KD2       | KD3       | KD4       | KD5       | KD6       | KD7       |
|-----------------------|-----------|-----------|-----------|-----------|-----------|-----------|-----------|-----------|
| $g_x$                 | 3.700E-03 | 1.135E-01 | 1.028E+00 | 3.741E+00 | 3.440E+00 | 7.341E-01 | 1.345E-02 | 9.160E-03 |
| $g_y$                 | 5.542E-03 | 1.913E-01 | 1.410E+00 | 5.168E+00 | 3.622E+00 | 1.141E+00 | 1.060E-01 | 2.154E-02 |
| $g_z$                 | 1.946E+01 | 1.579E+01 | 1.250E+01 | 8.625E+00 | 1.105E+01 | 1.787E+01 | 1.835E+01 | 1.937E+01 |
| E (cm <sup>-1</sup> ) | 0.000E+00 | 1.300E+02 | 1.961E+02 | 2.443E+02 | 2.861E+02 | 3.356E+02 | 4.186E+02 | 5.063E+02 |

TABLE S5 *ab initio* calculated principal g values and energies of the lowest-lying KDs of EYOKIO

| <b>EYOKIO</b> KD0     | KD1       | KD2       | KD3       | KD4       | KD5       | KD6       | KD7       |           |
|-----------------------|-----------|-----------|-----------|-----------|-----------|-----------|-----------|-----------|
| g <sub>x</sub>        | 6.534E-04 | 7.727E-02 | 1.071E-01 | 1.399E+00 | 8.965E-01 | 3.625E+00 | 1.472E+00 | 4.338E-01 |
| g <sub>y</sub>        | 9.508E-04 | 7.897E-02 | 1.277E-01 | 1.891E+00 | 3.476E+00 | 3.827E+00 | 6.182E+00 | 7.095E-01 |
| g <sub>z</sub>        | 1.985E+01 | 1.673E+01 | 1.317E+01 | 1.049E+01 | 7.996E+00 | 5.921E+00 | 1.139E+01 | 1.768E+01 |
| E (cm <sup>-1</sup> ) | 0.000E+00 | 2.427E+02 | 4.236E+02 | 5.267E+02 | 5.891E+02 | 6.263E+02 | 6.525E+02 | 6.804E+02 |

TABLE S6 *ab initio* calculated principal g values and energies of the lowest-lying KDs of DARTUN

| <b>DARTUN</b> KD0     | KD1       | KD2       | KD3       | KD4       | KD5       | KD6       | KD7       |           |
|-----------------------|-----------|-----------|-----------|-----------|-----------|-----------|-----------|-----------|
| g <sub>x</sub>        | 5.484E-03 | 2.178E-01 | 1.968E+00 | 1.866E+00 | 2.671E+00 | 1.073E+00 | 1.647E-01 | 1.907E-02 |
| g <sub>y</sub>        | 1.098E-02 | 3.582E-01 | 3.086E+00 | 5.516E+00 | 3.993E+00 | 1.907E+00 | 4.783E-01 | 3.845E-02 |
| g <sub>z</sub>        | 1.948E+01 | 1.542E+01 | 1.141E+01 | 1.135E+01 | 1.073E+01 | 1.700E+01 | 1.908E+01 | 1.973E+01 |
| E (cm <sup>-1</sup> ) | 0.000E+00 | 1.450E+02 | 2.147E+02 | 2.476E+02 | 2.892E+02 | 3.418E+02 | 4.008E+02 | 4.966E+02 |

TABLE S7 *ab initio* calculated principal g values and energies of the lowest-lying KDs of DARTOH

| <b>DARTOH</b> KD0     | KD1       | KD2       | KD3       | KD4       | KD5       | KD6       | KD7       |           |
|-----------------------|-----------|-----------|-----------|-----------|-----------|-----------|-----------|-----------|
| g <sub>x</sub>        | 6.155E-03 | 4.323E-01 | 2.830E+00 | 5.550E+00 | 4.585E-01 | 1.159E+00 | 1.281E-02 | 2.186E-03 |
| g <sub>y</sub>        | 1.883E-02 | 5.808E-01 | 4.786E+00 | 1.802E+00 | 3.343E+00 | 3.610E+00 | 3.066E-02 | 7.522E-03 |
| g <sub>z</sub>        | 1.934E+01 | 1.581E+01 | 1.132E+01 | 7.586E+00 | 9.449E+00 | 1.559E+01 | 1.949E+01 | 1.986E+01 |
| E (cm <sup>-1</sup> ) | 0.000E+00 | 1.196E+02 | 1.815E+02 | 2.174E+02 | 2.588E+02 | 2.854E+02 | 3.981E+02 | 5.389E+02 |

TABLE S8 *ab initio* calculated principal g values and energies of the lowest-lying KDs of UCIBAL

| <b>UCIBAL</b> KD0     | KD1       | KD2       | KD3       | KD4       | KD5       | KD6       | KD7       |           |
|-----------------------|-----------|-----------|-----------|-----------|-----------|-----------|-----------|-----------|
| g <sub>x</sub>        | 4.722E-03 | 7.536E-01 | 2.958E+00 | 5.391E+00 | 6.902E-01 | 8.837E-01 | 8.016E-02 | 1.202E-02 |
| g <sub>y</sub>        | 1.014E-02 | 8.436E-01 | 3.775E+00 | 3.420E+00 | 2.713E+00 | 1.439E+00 | 1.841E-01 | 2.436E-02 |
| g <sub>z</sub>        | 1.962E+01 | 1.573E+01 | 1.148E+01 | 7.360E+00 | 1.258E+01 | 1.588E+01 | 1.881E+01 | 1.967E+01 |
| E (cm <sup>-1</sup> ) | 0.000E+00 | 1.248E+02 | 1.673E+02 | 2.034E+02 | 2.324E+02 | 2.773E+02 | 3.809E+02 | 5.097E+02 |

TABLE S9 *ab initio* calculated principal g values and energies of the lowest-lying KDs of EYOKEK

| <b>EYOKEK</b> KD0     | KD1       | KD2       | KD3       | KD4       | KD5       | KD6       | KD7       |           |
|-----------------------|-----------|-----------|-----------|-----------|-----------|-----------|-----------|-----------|
| g <sub>x</sub>        | 6.365E-04 | 1.844E-01 | 1.376E+00 | 6.154E+00 | 2.846E+00 | 1.113E-01 | 2.816E-01 | 1.549E-02 |
| g <sub>y</sub>        | 1.734E-03 | 2.072E-01 | 1.529E+00 | 3.623E+00 | 3.754E+00 | 8.491E-01 | 8.898E-01 | 4.413E-02 |
| g <sub>z</sub>        | 1.982E+01 | 1.661E+01 | 1.287E+01 | 8.300E+00 | 1.257E+01 | 1.761E+01 | 1.914E+01 | 1.987E+01 |
| E (cm <sup>-1</sup> ) | 0.000E+00 | 1.961E+02 | 3.365E+02 | 4.232E+02 | 4.774E+02 | 5.425E+02 | 5.630E+02 | 6.213E+02 |

TABLE S10 *ab initio* calculated principal g values and energies of the lowest-lying KDs of GAQGOX

| GAQGOX KD0            | KD1       | KD2       | KD3       | KD4       | KD5       | KD6       | KD7       |           |
|-----------------------|-----------|-----------|-----------|-----------|-----------|-----------|-----------|-----------|
| g <sub>x</sub>        | 3.080E-03 | 1.344E-01 | 1.257E+00 | 3.421E+00 | 4.894E-01 | 2.473E+00 | 5.334E-01 | 7.866E-03 |
| g <sub>y</sub>        | 4.899E-03 | 1.669E-01 | 1.360E+00 | 4.964E+00 | 5.183E+00 | 3.635E+00 | 1.662E+00 | 1.321E-02 |
| g <sub>z</sub>        | 1.960E+01 | 1.623E+01 | 1.252E+01 | 8.707E+00 | 1.081E+01 | 1.245E+01 | 1.757E+01 | 1.986E+01 |
| E (cm <sup>-1</sup> ) | 0.000E+00 | 1.438E+02 | 2.272E+02 | 2.792E+02 | 3.128E+02 | 3.471E+02 | 3.862E+02 | 5.282E+02 |

TABLE S11 *ab initio* calculated principal g values and energies of the lowest-lying KDs of WALQEI

| WALQEI KD0            | KD1       | KD2       | KD3       | KD4       | KD5       | KD6       | KD7       |           |
|-----------------------|-----------|-----------|-----------|-----------|-----------|-----------|-----------|-----------|
| g <sub>x</sub>        | 7.525E-05 | 1.607E-01 | 1.247E+00 | 2.363E+00 | 3.938E+00 | 1.026E+00 | 5.760E-02 | 1.419E-02 |
| g <sub>y</sub>        | 3.353E-04 | 1.708E-01 | 1.285E+00 | 4.661E+00 | 4.533E+00 | 1.346E+00 | 3.355E-01 | 4.005E-01 |
| g <sub>z</sub>        | 1.980E+01 | 1.652E+01 | 1.288E+01 | 8.927E+00 | 1.109E+01 | 1.780E+01 | 1.934E+01 | 1.950E+01 |
| E (cm <sup>-1</sup> ) | 0.000E+00 | 1.941E+02 | 3.299E+02 | 4.173E+02 | 4.721E+02 | 5.330E+02 | 5.733E+02 | 5.925E+02 |

TABLE S12 *ab initio* calculated principal g values and energies of the lowest-lying KDs of EYOKAG

| EYOKAG KD0            | KD1       | KD2       | KD3       | KD4       | KD5       | KD6       | KD7       |           |
|-----------------------|-----------|-----------|-----------|-----------|-----------|-----------|-----------|-----------|
| g <sub>x</sub>        | 6.608E-04 | 1.876E-01 | 1.194E+00 | 2.670E+00 | 3.398E+00 | 3.447E-02 | 3.229E-01 | 1.890E-02 |
| g <sub>y</sub>        | 8.268E-04 | 2.097E-01 | 1.278E+00 | 5.080E+00 | 4.903E+00 | 8.869E-01 | 1.051E+00 | 7.588E-02 |
| g <sub>z</sub>        | 1.975E+01 | 1.645E+01 | 1.277E+01 | 8.764E+00 | 1.211E+01 | 1.760E+01 | 1.907E+01 | 1.980E+01 |
| E (cm <sup>-1</sup> ) | 0.000E+00 | 1.732E+02 | 2.959E+02 | 3.747E+02 | 4.230E+02 | 4.941E+02 | 5.141E+02 | 5.595E+02 |

TABLE S13 *ab initio* calculated principal g values and energies of the lowest-lying KDs of GUYRAU

| GUYRAU KD0            | KD1       | KD2       | KD3       | KD4       | KD5       | KD6       | KD7       |           |
|-----------------------|-----------|-----------|-----------|-----------|-----------|-----------|-----------|-----------|
| g <sub>x</sub>        | 5.058E-03 | 2.165E-01 | 1.844E+00 | 4.428E+00 | 2.481E+00 | 1.916E-02 | 5.321E-02 | 1.040E-02 |
| g <sub>y</sub>        | 6.462E-03 | 3.563E-01 | 2.540E+00 | 6.437E-01 | 6.405E+00 | 1.729E-01 | 8.878E-02 | 2.922E-02 |
| g <sub>z</sub>        | 1.957E+01 | 1.583E+01 | 1.154E+01 | 7.234E+00 | 1.245E+01 | 1.587E+01 | 1.851E+01 | 1.900E+01 |
| E (cm <sup>-1</sup> ) | 0.000E+00 | 1.579E+02 | 2.399E+02 | 2.955E+02 | 3.238E+02 | 4.202E+02 | 4.791E+02 | 5.323E+02 |

TABLE S14 *ab initio* calculated principal g values and energies of the lowest-lying KDs of GAQGOX01

| GAQGOX01 KD0          | KD1       | KD2       | KD3       | KD4       | KD5       | KD6       | KD7       |           |
|-----------------------|-----------|-----------|-----------|-----------|-----------|-----------|-----------|-----------|
| g <sub>x</sub>        | 1.787E-02 | 2.803E-01 | 7.901E-01 | 2.721E+00 | 3.064E-02 | 2.168E+00 | 2.720E-01 | 4.235E-03 |
| g <sub>y</sub>        | 3.209E-02 | 4.095E-01 | 8.497E-01 | 5.464E+00 | 3.569E+00 | 4.219E+00 | 6.967E-01 | 7.089E-03 |
| g <sub>z</sub>        | 1.944E+01 | 1.592E+01 | 1.258E+01 | 8.402E+00 | 1.058E+01 | 1.396E+01 | 1.918E+01 | 1.990E+01 |
| E (cm <sup>-1</sup> ) | 0.000E+00 | 1.212E+02 | 2.059E+02 | 2.554E+02 | 2.943E+02 | 3.341E+02 | 4.018E+02 | 5.135E+02 |

TABLE S15 *ab initio* calculated principal g values and energies of the lowest-lying KDs of UCEZUZ

| UCEZUZ KD0            | KD1       | KD2       | KD3       | KD4       | KD5       | KD6       | KD7       |
|-----------------------|-----------|-----------|-----------|-----------|-----------|-----------|-----------|
| $g_x$                 | 2.960E-03 | 6.543E-02 | 2.014E+00 | 4.369E+00 | 3.162E-01 | 7.204E-01 | 1.890E-02 |
| $g_y$                 | 6.809E-03 | 1.083E+00 | 3.054E+00 | 6.393E+00 | 1.765E+00 | 1.232E+00 | 2.140E-01 |
| $g_z$                 | 1.968E+01 | 1.613E+01 | 1.245E+01 | 9.204E+00 | 1.357E+01 | 1.599E+01 | 1.816E+01 |
| E (cm <sup>-1</sup> ) | 0.000E+00 | 1.368E+02 | 1.530E+02 | 1.937E+02 | 2.279E+02 | 2.854E+02 | 3.818E+02 |

TABLE S16 *ab initio* calculated principal g values and energies of the lowest-lying KDs of DOGMUJ

| DOGMUJ KD0            | KD1       | KD2       | KD3       | KD4       | KD5       | KD6       | KD7       |
|-----------------------|-----------|-----------|-----------|-----------|-----------|-----------|-----------|
| $g_x$                 | 2.165E-02 | 1.595E+00 | 1.131E+00 | 6.433E+00 | 1.989E+00 | 7.536E-01 | 6.229E-02 |
| $g_y$                 | 3.247E-02 | 4.570E+00 | 3.433E+00 | 3.026E+00 | 3.053E+00 | 1.413E+00 | 1.288E-01 |
| $g_z$                 | 1.935E+01 | 1.350E+01 | 9.947E+00 | 7.919E+00 | 1.160E+01 | 1.652E+01 | 1.947E+01 |
| E (cm <sup>-1</sup> ) | 0.000E+00 | 9.648E+01 | 1.214E+02 | 1.680E+02 | 1.991E+02 | 2.446E+02 | 3.199E+02 |

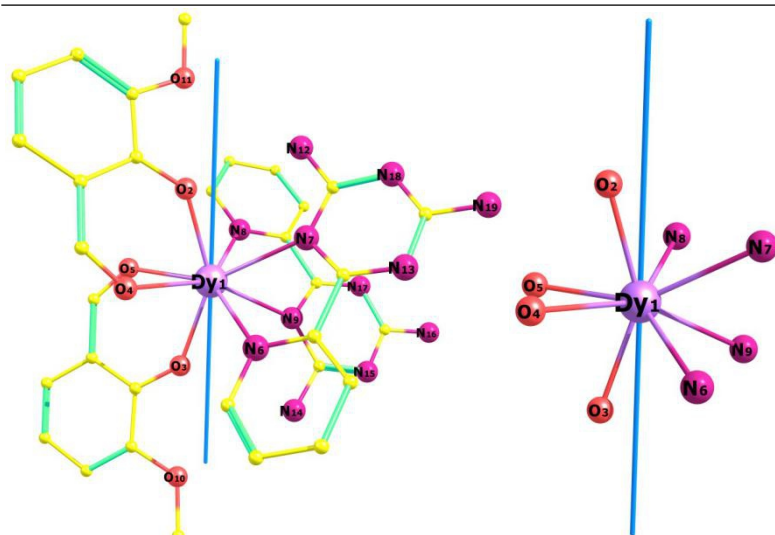

FIG. S1 Structure and *ab initio* magnetic easy axis of WALPUX (left: full, right: first sphere)

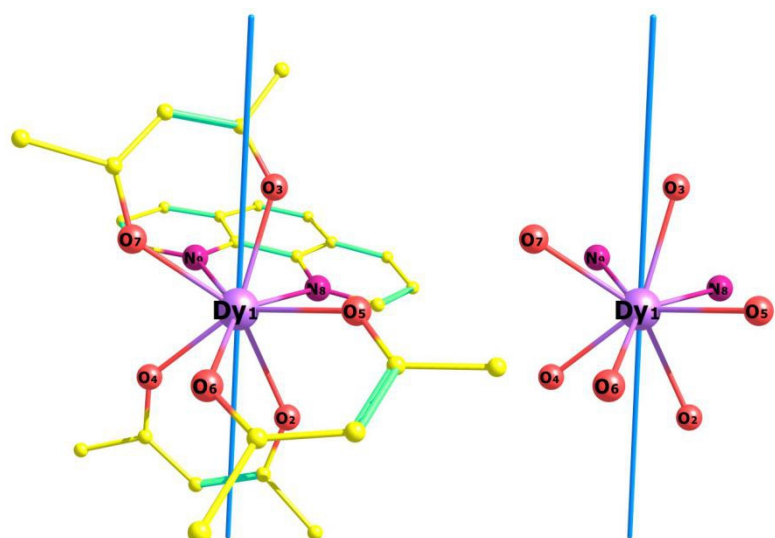

FIG. S2 Structure and *ab initio* magnetic easy axis of ISEBIS (left: full, right: first sphere)

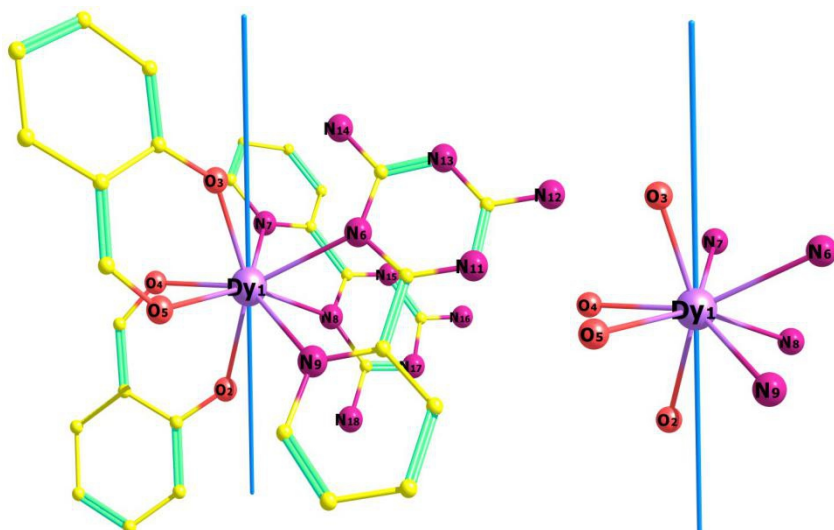

FIG. S3 Structure and *ab initio* magnetic easy axis of EYOKIO (left: full, right: first sphere)

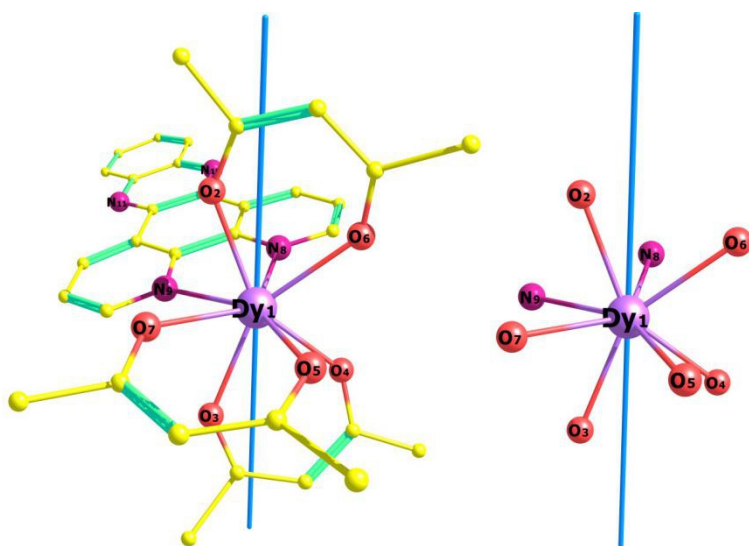

FIG. S4 Structure and *ab initio* magnetic easy axis of DARTUN (left: full, right: first sphere)

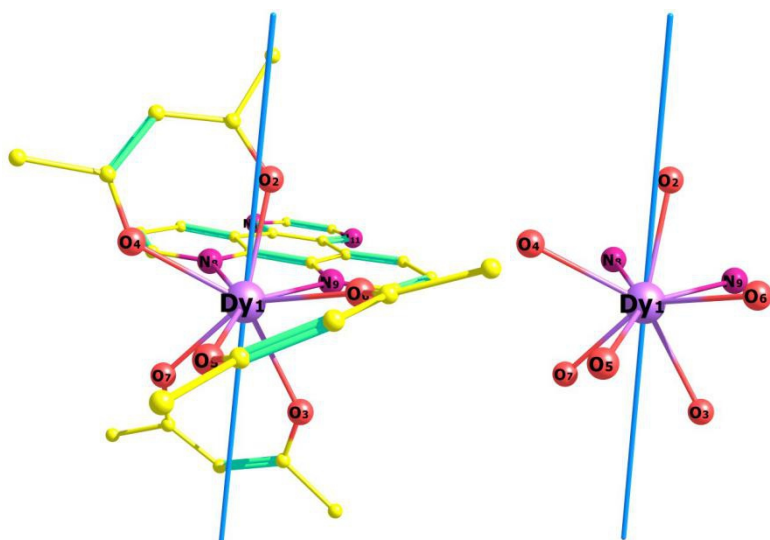

FIG. S5 Structure and *ab initio* magnetic easy axis of DARTOH (left: full, right: first sphere)

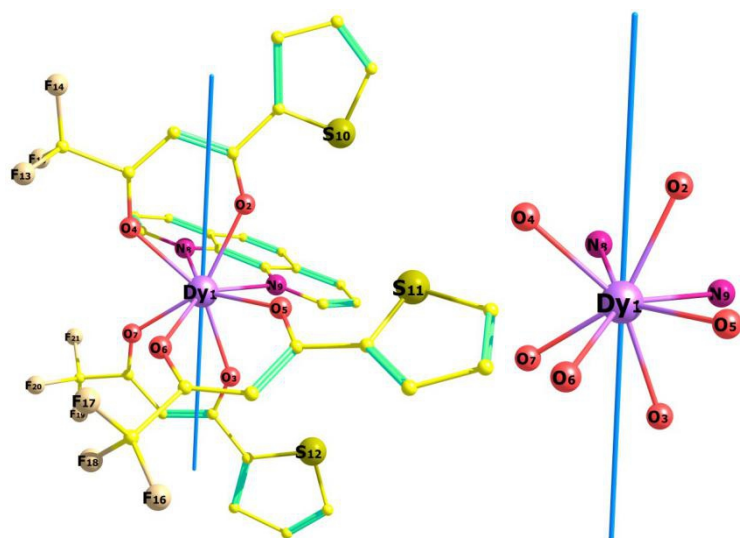

FIG. S6 Structure and *ab initio* magnetic easy axis of UCIBAL (left: full, right: first sphere)

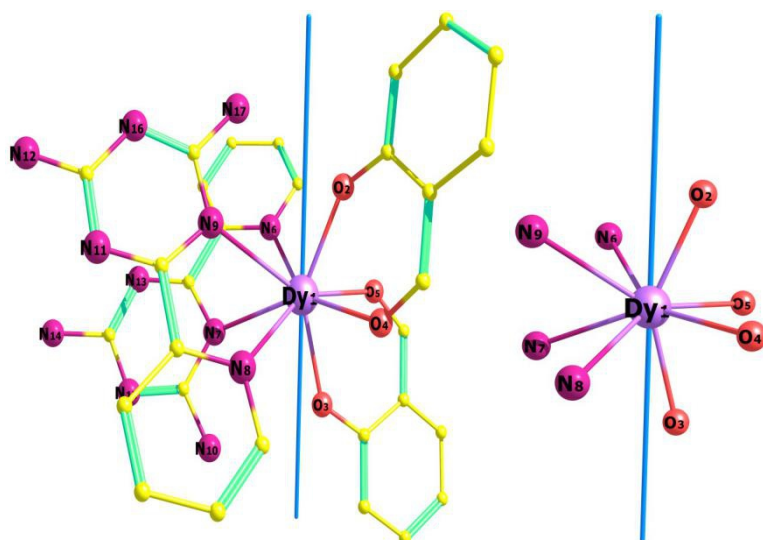

FIG. S7 Structure and *ab initio* magnetic easy axis of EYOKEK (left: full, right: first sphere)

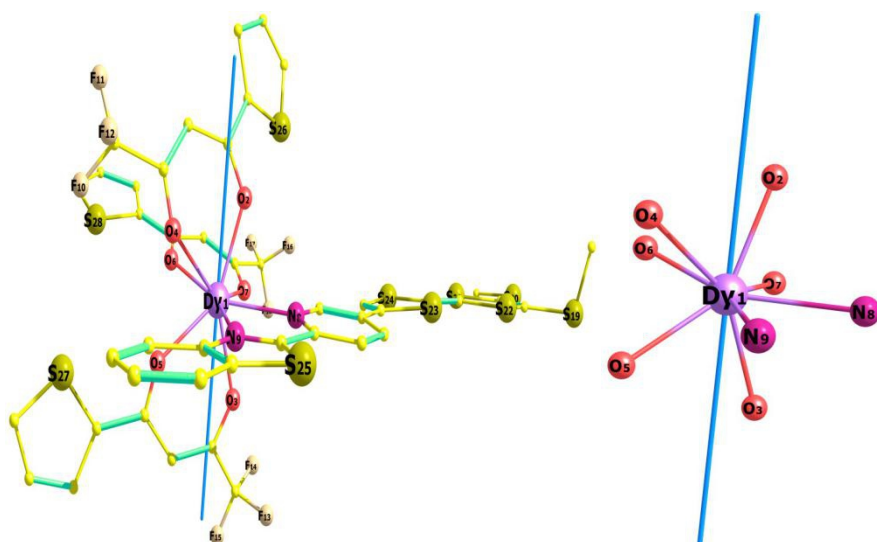

FIG. S8 Structure and *ab initio* magnetic easy axis of GAQGOX (left: full, right: first sphere)

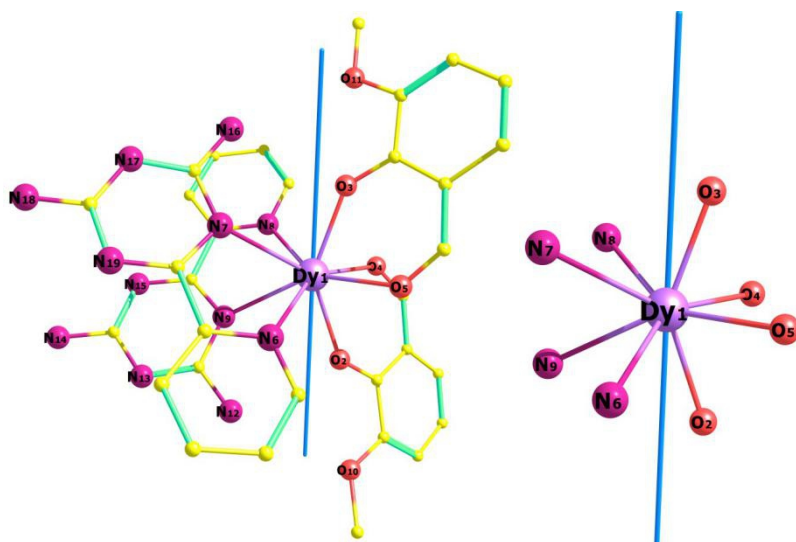

FIG. S9 Structure and *ab initio* magnetic easy axis of WALQEI (left: full, right: first sphere)

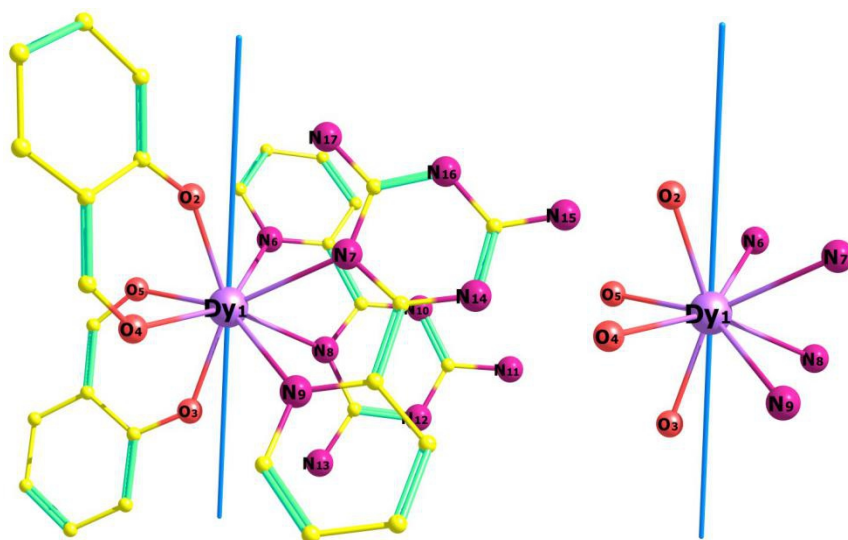

FIG. S10 Structure and *ab initio* magnetic easy axis of EYOKAG (left: full, right: first sphere)

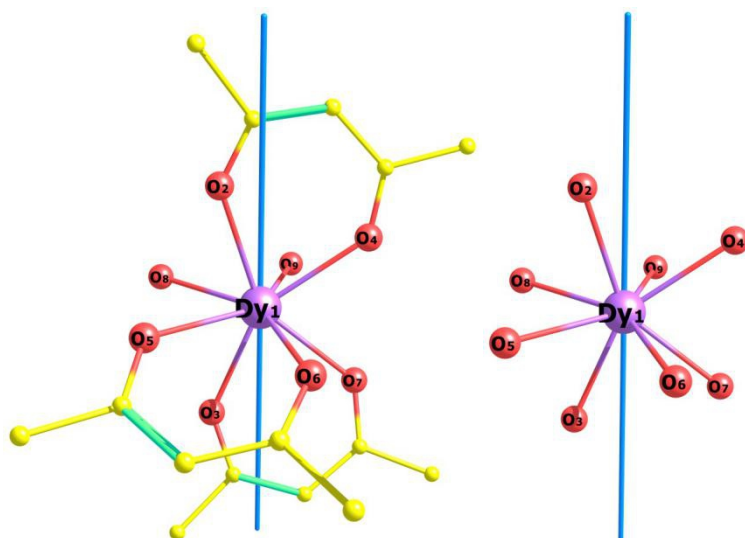

FIG. S11 Structure and *ab initio* magnetic easy axis of GUYRAU (left: full, right: first sphere)



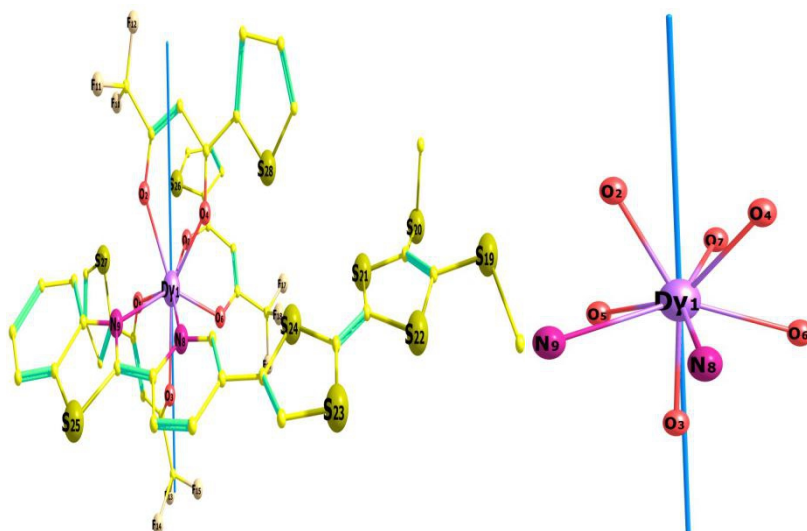

FIG. S12 Structure and *ab initio* magnetic easy axis of GAQGOX01 (left:full, right: first sphere)

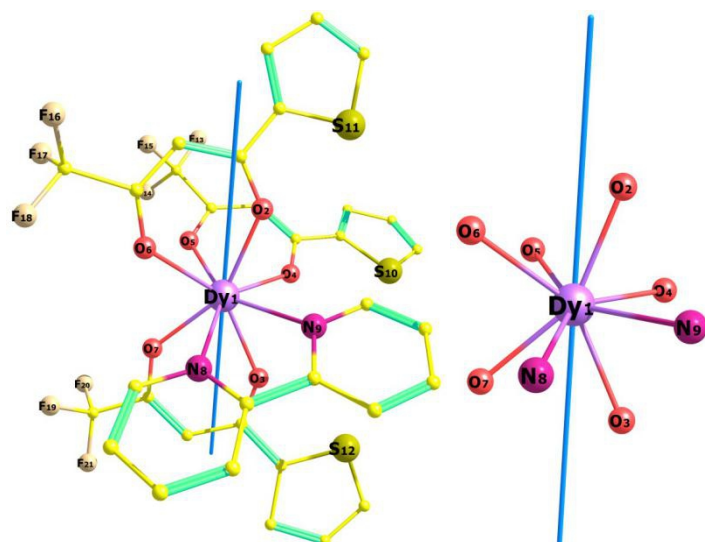

FIG. S13 Structure and *ab initio* magnetic easy axis of UCEZUZ (left: full, right: first sphere)

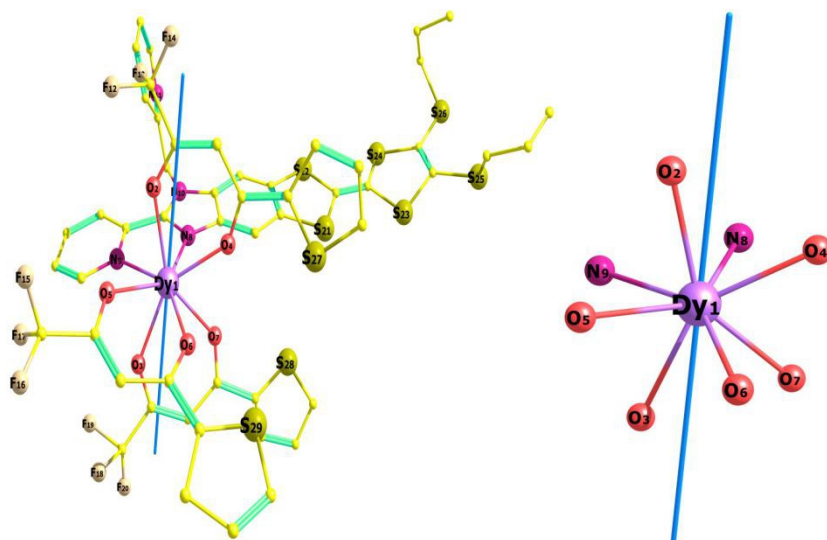

FIG. S14 Structure and *ab initio* magnetic easy axis of DUGMUJ (left: full, right: first sphere)



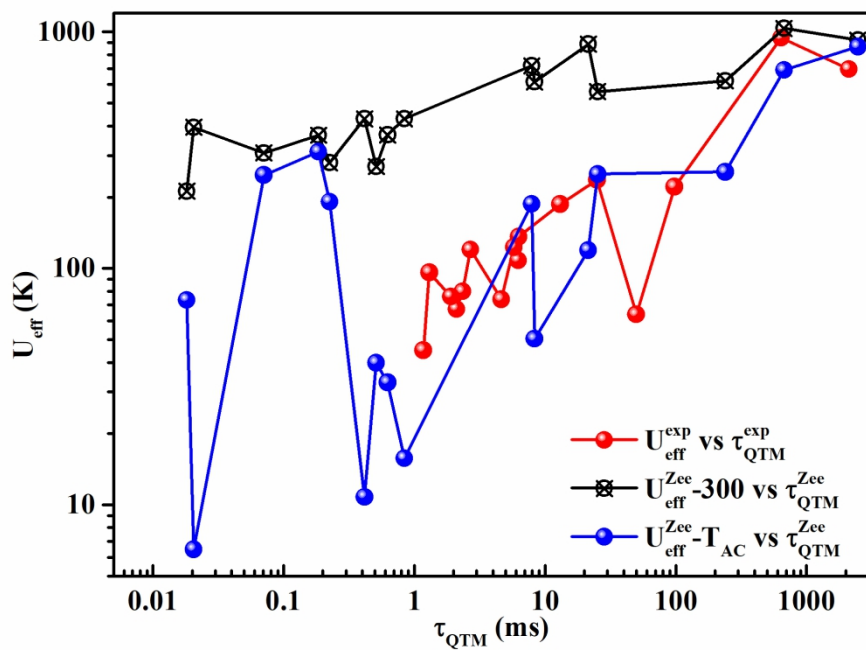

FIG. S15  $U_{\text{eff}}$  vs  $\tau_{\text{QTM}}$  for all of the selected SAP Dy-SIM

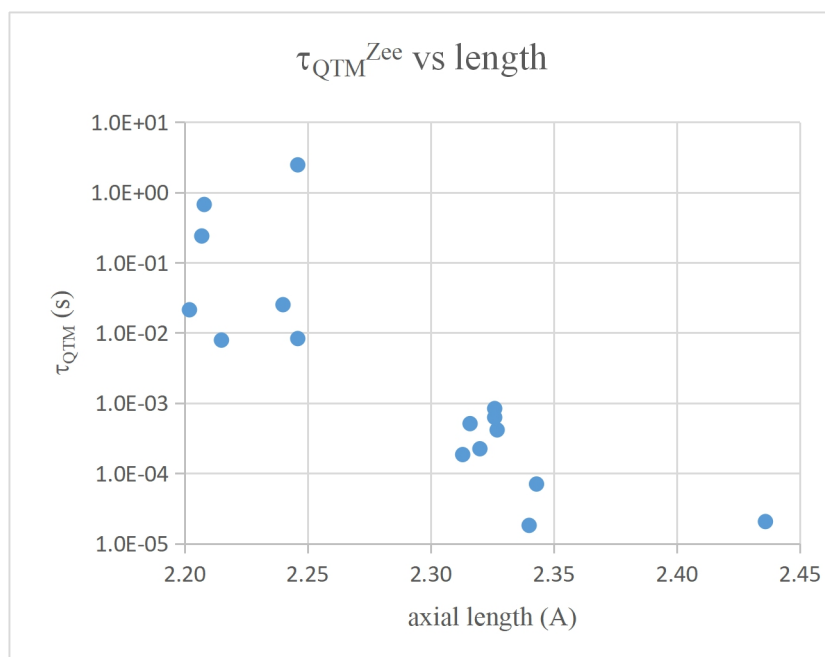

FIG. S16 The relation between  $\tau_{\text{QTM}}^{\text{Zee}}$  and averaged bond length of the two axial ligating atoms

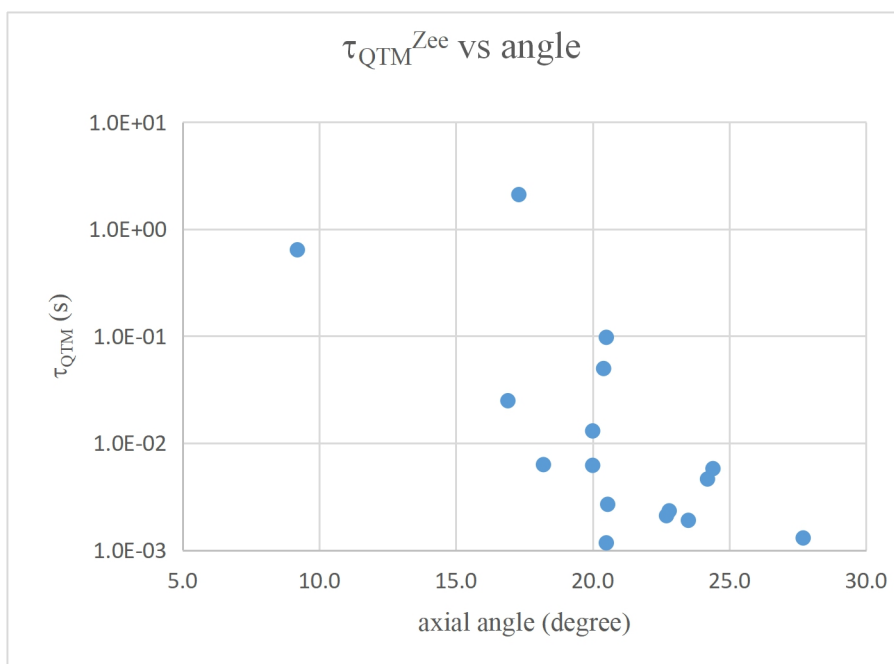

FIG. S17 The relation between  $\tau_{\text{QTM}}^{\text{Zee}}$  and averaged angle of the two axial ligating atoms with respect to magnetic easy axis

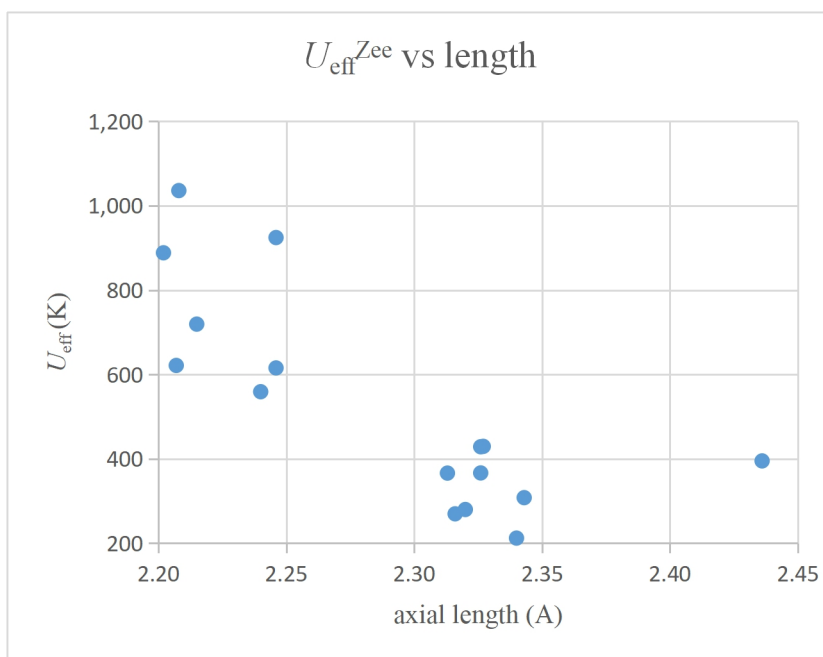

FIG. S18 The relation between  $U_{\text{eff}}^{\text{Zee}}$  and averaged bond length of the two axial ligating atoms

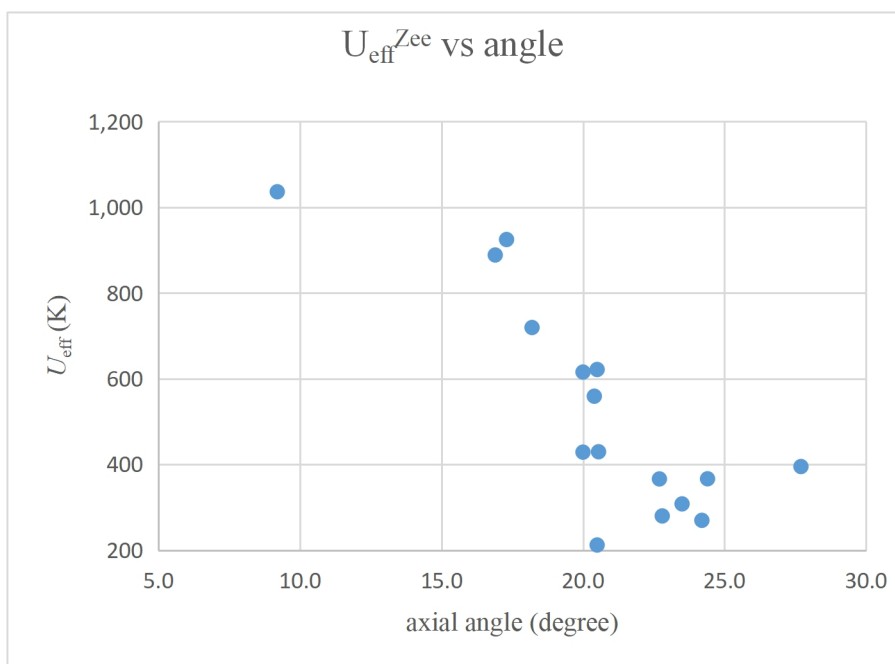

FIG. S19 The relation between  $U_{\text{eff}}^{\text{Zee}}$  and averaged angle of the two axial ligating atoms with respect to magnetic easy axis

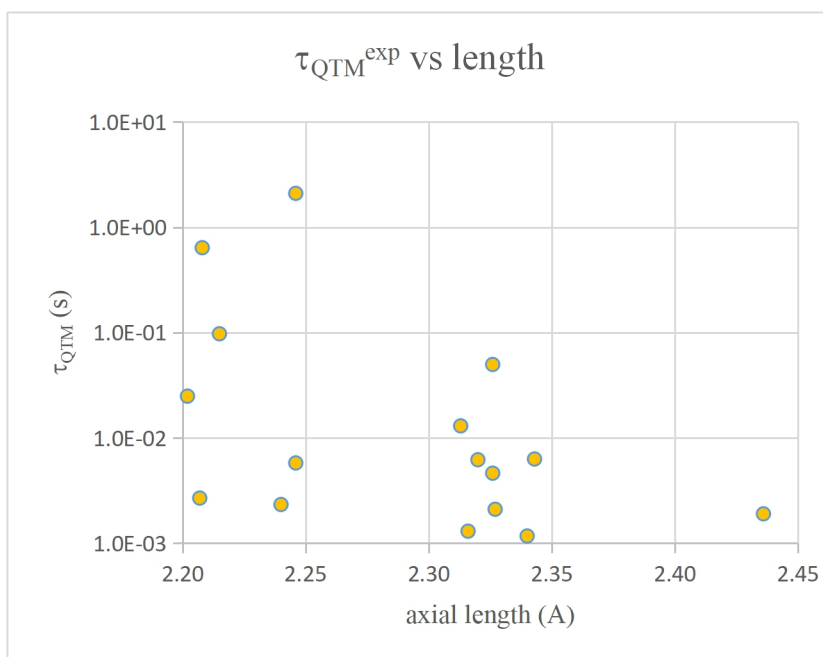

FIG. S20 The relation between  $\tau_{\text{QTM}}^{\text{exp}}$  and averaged bond length of the two axial ligating atoms

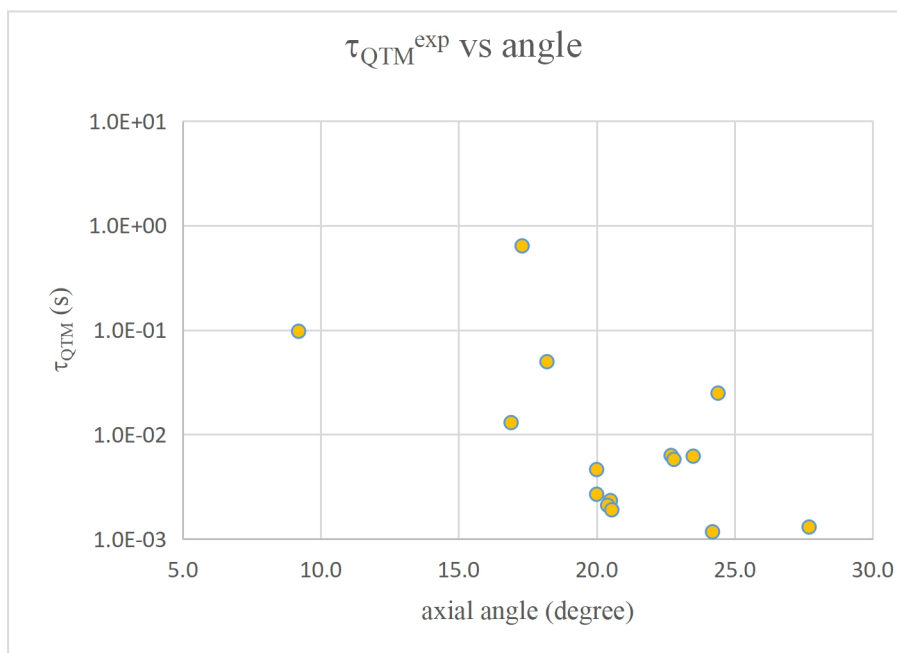

FIG. S21 The relation between  $\tau_{\text{QTM}}^{\text{exp}}$  and averaged angle of the two axial ligating atoms with respect to magnetic easy axis

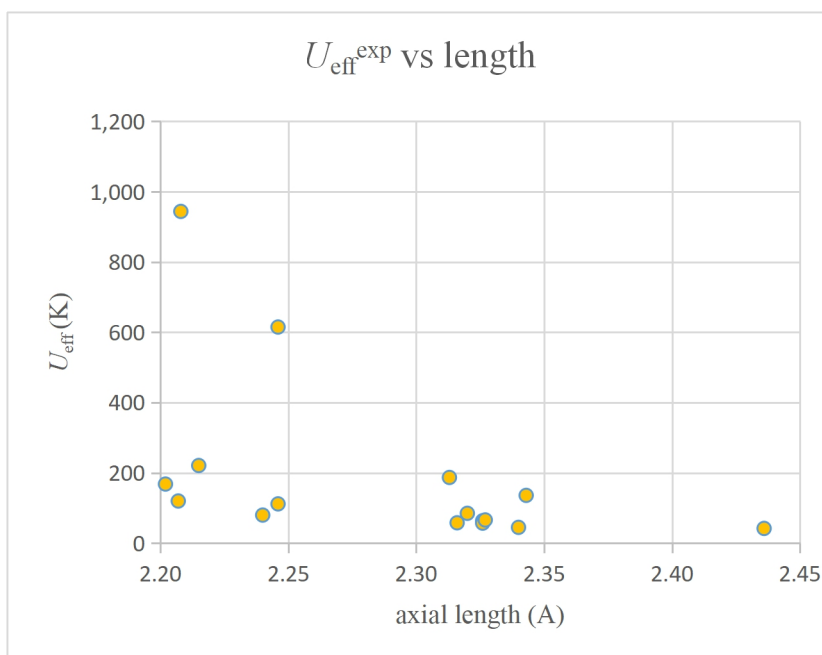

FIG. S22 The relation between  $U_{\text{eff}}^{\text{exp}}$  and averaged bond length of the two axial ligating atoms

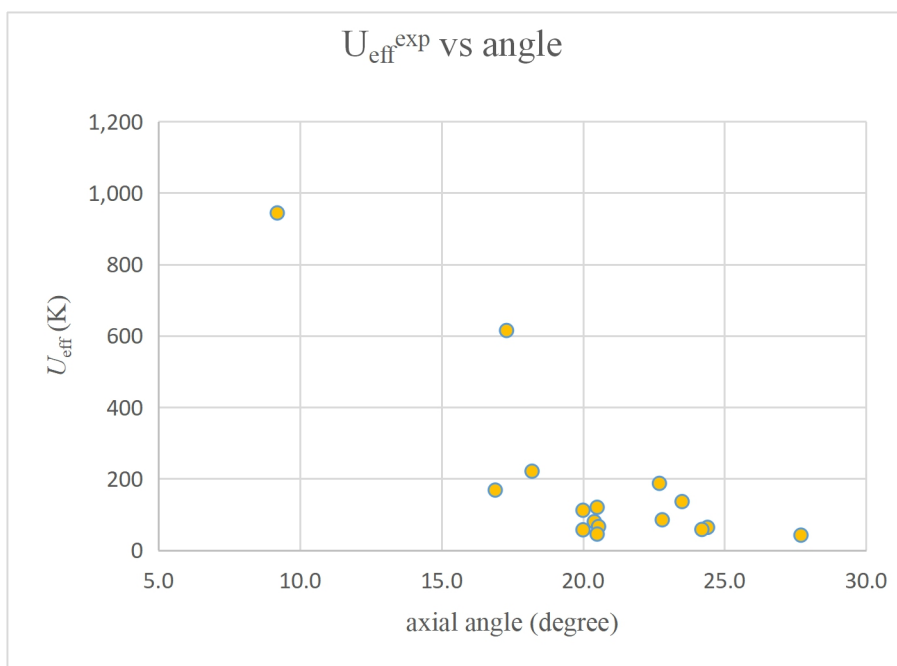

FIG. S23 The relation between  $U_{\text{eff}}^{\text{exp}}$  and averaged angle of the two axial ligating atoms with respect to magnetic easy axis
